# Supplementary material for: The Biological Significance of Pyruvate Sensing and Uptake in Salmonella enterica Serovar Typhimurium
Source: MDPI journal article supplement (doi:10.3390/microorganisms10091751), 2022-08-30
Supplement: s1 [file s1]

# The biological significance of pyruvate sensing and uptake in *Salmonella enterica* serovar Typhimurium

Stephanie Paulini <sup>1</sup>, Florian D. Fabiani <sup>1,†</sup>, Anna S. Weiss <sup>2</sup>, Ana Laura Moldoveanu <sup>3</sup>, Sophie Helaine <sup>3,‡</sup>, Bärbel Stecher <sup>2,4</sup> and Kirsten Jung <sup>1,\*</sup>

<sup>1</sup> Department of Microbiology, Ludwig-Maximilians-University Munich, 82152 Planegg-Martinsried, Germany

<sup>2</sup> Max von Pettenkofer Institute of Hygiene and Medical Microbiology, Faculty of Medicine, Ludwig-Maximilians-University Munich, 80336 Munich, Germany

<sup>3</sup> MRC Centre for Molecular Bacteriology and Infection, Imperial College London, London SW7 2DD, UK

<sup>4</sup> German Center for Infection Research (DZIF), Partner Site LMU Munich, 80337 Munich, Germany

\* Correspondence: jung@lmu.de; Tel.: +49-(0)89/2180-74500

† Present affiliation: Bayer AG, 13353 Berlin, Germany.

‡ Present affiliation: Department of Microbiology, Harvard Medical School, Boston, MA 02115, USA.

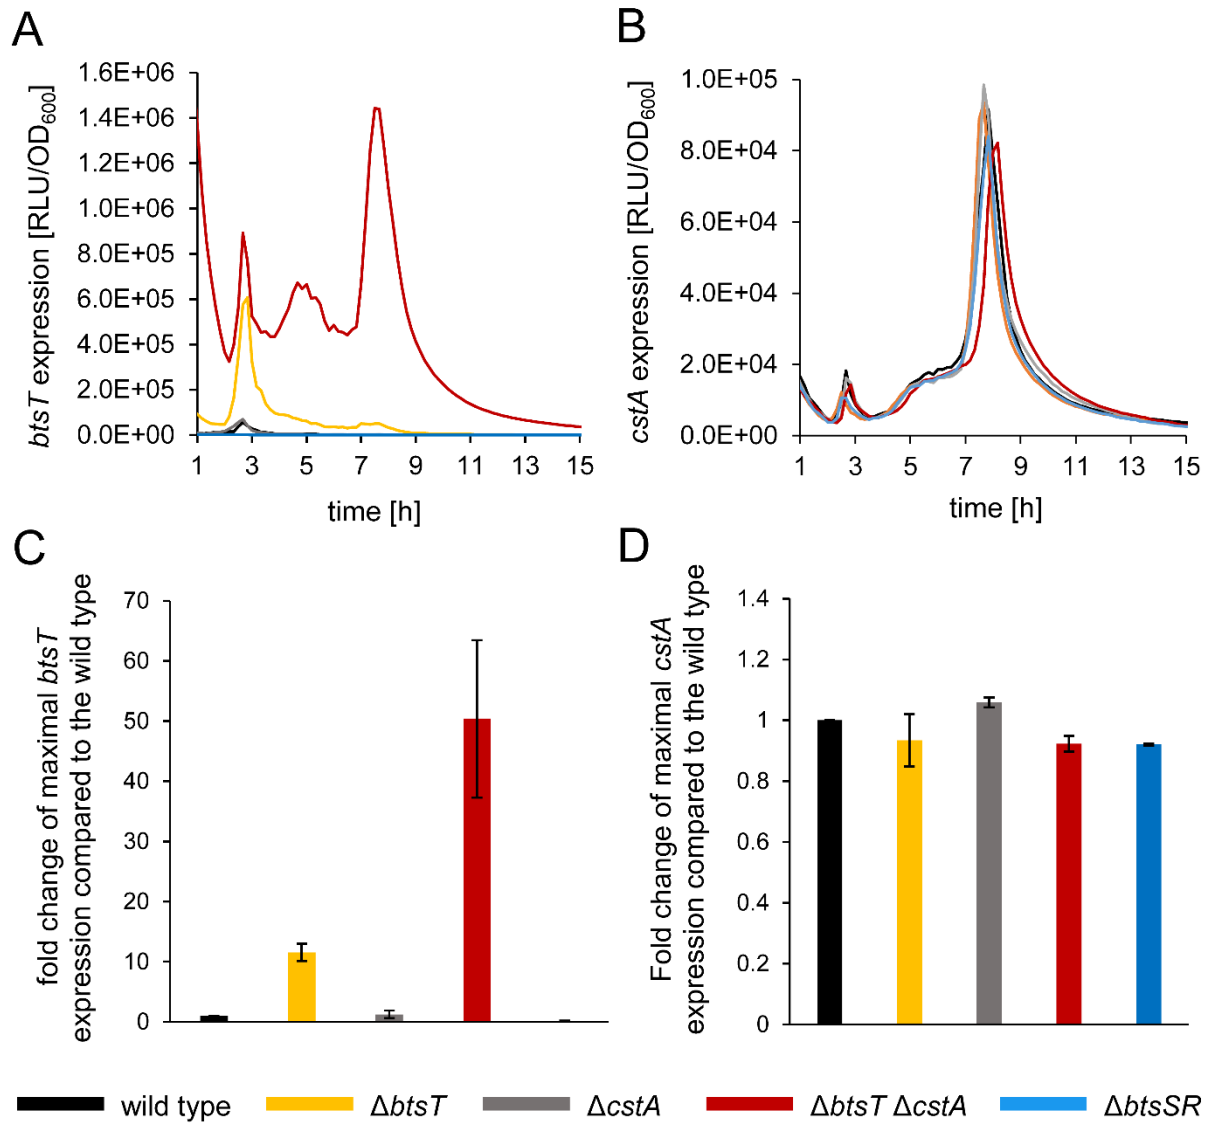

**Figure S1.** Expression of *btsT* and *cstA* in *S. Typhimurium* mutants. SL1344 wild-type (black),  $\Delta btsT$  (yellow),  $\Delta cstA$  (grey),  $\Delta btsT \Delta cstA$  (red) and  $\Delta btsSR$  (blue) cells harboring the reporter plasmid for *btsT* (pBBR1-MCS5-*PbtsT-lux*) or for *cstA* (pBBR1-MCS5-*PcstA-lux*) were grown in LB medium in a plate reader at 37 °C. Luminescence values were measured over time and gene expression was determined as RLU per 1 OD<sub>600</sub>. **A)** Expression of *btsT* during growth. **B)** Expression of *cstA* during growth. **C)** Maximal *btsT* expression depicted as fold change from wild-type value. **D)** Maximal *cstA* expression depicted as fold change from the wild-type value. A, B: graphs represent the mean of three independent replicates. the standard deviations were below 10%. C, D: Error bars represent the standard deviations of the mean of three independent replicates.

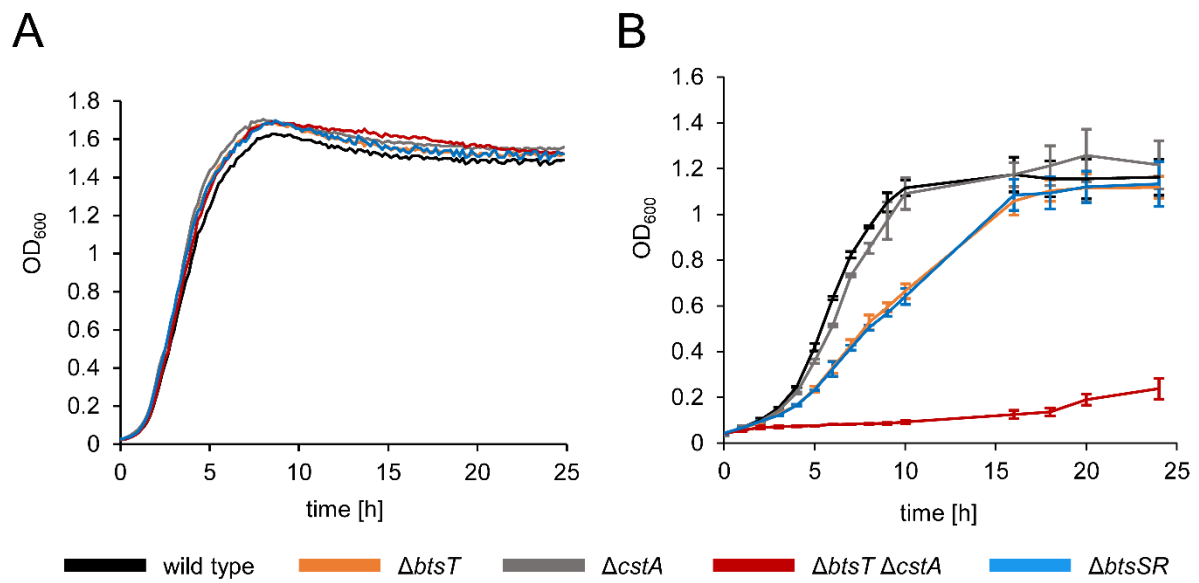

**Figure S2.** Growth of *S. Typhimurium* mutants. SL1344 wild-type (black),  $\Delta btsT$  (yellow),  $\Delta cstA$  (grey),  $\Delta btsT \Delta cstA$  (red) and  $\Delta btsSR$  (blue) cells were grown for 24 hours at 37°C in **A)** LB medium or **B)** M9 minimal medium with 60 mM pyruvate.

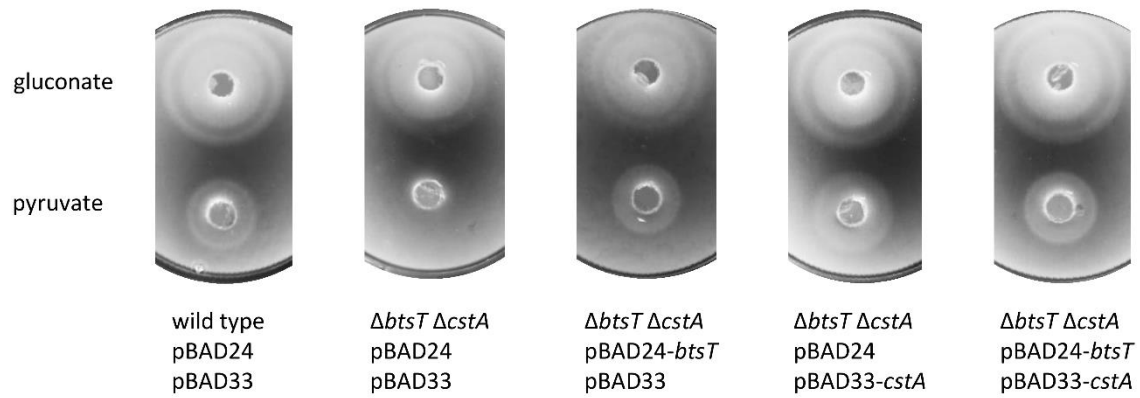

**Figure S3.** *S. Typhimurium*  $\Delta btsT \Delta cstA$  mutant lost chemotactic response to pyruvate. Chemotaxis was tested by mixing SL1344 wild-type or  $\Delta btsT \Delta cstA$  cells harboring the indicated expression plasmids for *btsT* (pBAD24-*btsT*) and/or *cstA* (pBAD33-*cstA*) or the empty vectors with 0.3% (wt/vol) M9 soft agar and pouring them over 1.5% (wt/vol) M9 agar plugs containing either 60 mM gluconate (above) or 60 mM pyruvate (below). Plates were incubated at 37 °C for 4 hours, and the pictures are representative of three independent experiments.

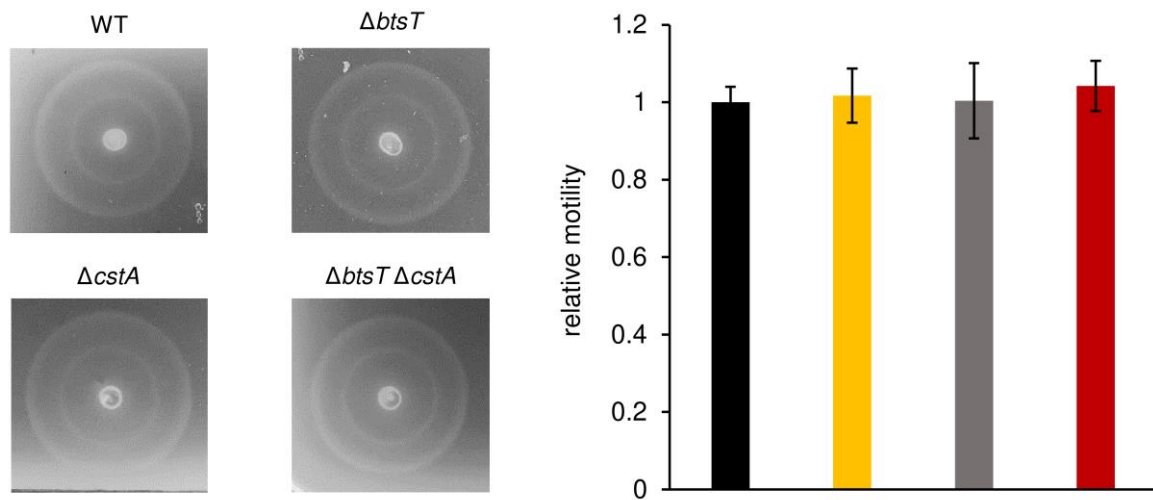

**Figure S4.** Motility of *S. Typhimurium* is not affected by deletions of *btsT* or *cstA*. Motility of SL1344 wild type (upper left, black),  $\Delta btsT$  (upper right, yellow),  $\Delta cstA$  (lower left, grey) and  $\Delta btsT \Delta cstA$  (lower right, red) cells was tested by spotting equal numbers of cells on 0.3% LB soft agar, incubating the plates at 37°C for 3 hours and measuring the diameter of the ring with the software ImageJ [54]. Images of rings are representative of four independent experiments and relative motility was determined in relation to the mean diameter of the wild type ring.

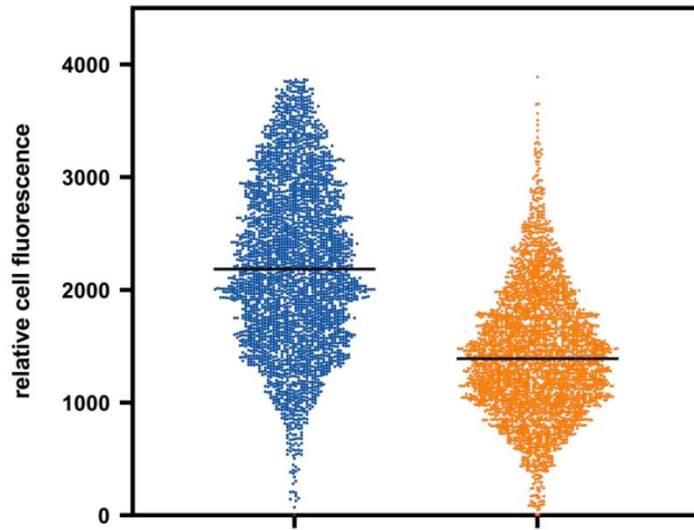

**Figure S5.** Expression of *btsT* in *S. Typhimurium* under SPI2 inducing conditions. Strain SL1344 *btsT::mNeonGreen*, which chromosomally encodes a fusion between *btsT* and *mNeonGreen*, was used to measure expression of *btsT* in single cells. Cells were grown in NonSPI2 (blue) or InSPI2 (orange) medium with 4  $\mu\text{g/ml}$  histidine and 60 mM pyruvate as C-source until mid-exponential phase. Samples were taken for fluorescence microscopy. To quantify relative fluorescence intensities of single cells, phase contrast and fluorescent images were analyzed using the ImageJ [54] plugin MicrobeJ [77]. In total >1000 cells were quantified per condition.

**Table S1.** Oligonucleotides used in this study.

|     | DNA sequence                                                          | Description                                                                                        |
|-----|-----------------------------------------------------------------------|----------------------------------------------------------------------------------------------------|
| #1  | CGCTGTGCGCTACCCGGCATCAGTTT<br>GTGGTGTGAAGATTAAGACCCACTTT<br>CATT      | Primer 1 for tetRA-insertion by $\lambda$ -Red recombination in <i>btsT</i>                        |
| #2  | ATTAAACTTACAACCAGGTTTACTATG<br>GATACGAAAAAGCTAAGCACTTGTCTC<br>TG      | Primer 2 for tetRA-insertion by $\lambda$ -Red recombination in <i>btsT</i>                        |
| #3  | ATTAAACTTACAACCAGGTTTACTATG<br>GATACGAAAAAGTCTTCACACCACTAA<br>AACTG   | Primer 1 for clean deletion of <i>btsT</i>                                                         |
| #4  | AGTCCGGAATACCAATCAACA                                                 | Primer 2 for clean deletion of <i>btsT</i>                                                         |
| #5  | ACCGCTTAAACCGCCATACA                                                  | Primer 1 for sequencing of $\Delta btsT$                                                           |
| #6  | ACGTTGCGGGAAGAACTCTT                                                  | Primer 2 for sequencing of $\Delta btsT$                                                           |
| #7  | GGCAAAACGATATTCTAACAGTCTTTA<br>CAGGCCAATCGCTTAAGACCCACTTT<br>CATT     | Primer 1 for tetRA-insertion by $\lambda$ -Red recombination in <i>btsSR</i>                       |
| #8  | TTTAATTGAAGTGTGGTTTGCGGGTATGT<br>ACGAGTTTAATCTAAGCACTTGTCTCCTG        | Primer 2 for tetRA-insertion by $\lambda$ -Red recombination in <i>btsSR</i>                       |
| #9  | TTGTTGATACGACGTTCCGC                                                  | Primer 1 for clean deletion of <i>btsSR</i>                                                        |
| #10 | TTTAATTGAAGTGTGGTTTGCGGGTATGT<br>ACGAGTTTAATGCGATTGGCCTGTAAAA<br>GAC  | Primer 2 for clean deletion of <i>btsSR</i>                                                        |
| #11 | TGGAACACCCAAACGGACAACAATAT<br>GAATAAATCAGGGTAGGCTGGAGCTGCT<br>TCGAA   | Primer 1 to amplify the FRT-kanamycin-FRT cassette from pKD46 for replacement of <i>cstA</i>       |
| #12 | GGAGAGGGCTATTGATGTAAAAAGATT<br>AGTGC GCGCCTTTTCCTCCTTAGTTCCTA<br>TTCC | Primer 2 to amplify the FRT-kanamycin-FRT cassette from pKD46 for replacement of <i>cstA</i>       |
| #13 | CTCTTTGACGAGCAGGGGAG                                                  | Primer 1 for sequencing of $\Delta cstA$                                                           |
| #14 | CGTCTGATCCGGATGCGTTA                                                  | Primer 2 for sequencing of $\Delta cstA$                                                           |
| #15 | AAAAAATCTAGAGCGATGACGTGCTGG<br>AGGCG                                  | Primer 1 to amplify the promoter of <i>cstA</i> to create pBBR1-MCS5- <i>PcstA-lux</i> , XbaI site |
| #16 | AAAAAACTCGAGAGTTGTTGTCCGTTTG<br>GGTG                                  | Primer 2 to amplify the promoter of <i>cstA</i> to create pBBR1-MCS5- <i>PcstA-lux</i> , XhoI site |
| #17 | AAAAAATCTAGAAGTTTGCAATACGGTG<br>AAGT                                  | Primer 1 to amplify the promoter of <i>btsT</i> to create pBBR1-MCS5- <i>PbtsT-lux</i> , XbaI site |
| #18 | AAAAAACTCGAGAGTAAACCTGGTTG<br>TAAGT                                   | Primer 2 to amplify the promoter of <i>btsT</i> to create pBBR1-MCS5- <i>PbtsT-lux</i> , XhoI site |
| #19 | GCGCGCGAATTCATCTATGGATACGAAA<br>AAGATATT                              | Primer 1 to amplify <i>btsT</i> to create pBAD24- <i>btsT</i> , EcoRI site                         |

|     |                                                            |                                                                                 |
|-----|------------------------------------------------------------|---------------------------------------------------------------------------------|
| #20 | GCTAGCAAGCTTTTAGTGATGGTGATGG<br>TGATGGTGGTGTGAAGAGATCTTCA  | Primer 2 to amplify <i>btsT</i> to create pBAD24-<br><i>btsT</i> , HindIII site |
| #21 | GCGCGCGAATTCACATGAATAAATCAG<br>GGAAATA                     | Primer 1 to amplify <i>cstA</i> to create pBAD3- <i>cstA</i> ,<br>EcoRI site    |
| #22 | GCTAGCAAGCTTTTAGTGATGGTGATGG<br>TGATGGTGGCGCGCCTTTCGCCTGCG | Primer 2 to amplify <i>cstA</i> to create pBAD3- <i>cstA</i> ,<br>HindIII site  |

## Supplementary methods

**Strain construction of SL1344 *btsT::mNeonGreen*.** Chromosomal fusions were created by double homologous recombination using the pNPTS138-R6KT suicide plasmid [47]. SL1344 *btsT* was amplified by PCR from SL1344 genomic DNA with oligonucleotides #38 and #39, without keeping the stop codon. The *mNeonGreen* gene was amplified by PCR from a plasmid (Peter Graumann, Marburg) with oligonucleotides #40 and #41. An 800 bp region directly downstream of *btsT* was amplified by PCR from SL1344 genomic DNA with oligonucleotides #42 and #43. The pNPTS138-R6KT backbone was linearized with oligonucleotides #37 and #44. All fragments were created with overlaps of 20 bp for assembly using the NEBuilder kit (New England Biolabs, Ipswich, MA, USA). The final pNPTS138-R6KT-*btsT::mNeonGreen* plasmid was first transformed into *E. coli* DH5 $\alpha$  and confirmed by sequencing. Then it was transferred into *E. coli* WM3064 for conjugation with SL1344. Double homologous recombination was induced as described in the main manuscript. Oligonucleotide sequences are listed in table S1.

***In vivo* single cell fluorescence measurements.** SL1344 cells with the chromosomal fusion *btsT::mNeonGreen* were grown in InSPI2 and NonSPI2 medium [69] with 4  $\mu$ g/ml histidine and 60 mM pyruvate as carbon source, inoculated from overnight culture to an initial OD<sub>600</sub> of 0.05. In exponential growth phase, samples were taken and 2  $\mu$ l of the culture were spotted on 1% (wt/vol) agarose prepared with PBS on a microscope slide and sealed with a cover slide. Microscopy was performed using a DMI6000 B fluorescence microscope (Leica Microsystems, Wetzlar, Germany), with an excitation wavelength of 485 nm and a 510-nm emission filter. To quantify single cell fluorescence, 1000 cells per condition (InSPI2 or NonSPI2) were analyzed using the plug-in MicrobeJ [77] of the software ImageJ [54], as described before [46]. The background was subtracted for each cell.
